# Supplementary material for: Graphene-assisted synergistic electronic DOS modulation and phonon scattering to improve the thermoelectric performance of Mg3Sb2-based materials
Source: Royal Society of Chemistry journal article supplement (doi:10.1039/d3ta02431h), 2023-01-01
Supplement: d3ta02431h1.pdf [file d3ta02431h1.pdf]

## Supporting Information

### Graphene-Assisted Synergistic Electronic DOS Modulation and Phonon Scattering to Improve the Thermoelectric Performance of Mg<sub>3</sub>Sb<sub>2</sub>-Based Materials

Qiang Zhang,<sup>\*abc</sup> Jiadang Li,<sup>a</sup> Nagendra S. Chauhan,<sup>c</sup> Lifei Wang,<sup>be</sup> Zhicheng Huang,<sup>c</sup> Wenhao Fan,<sup>d</sup> Kei Hayashi,<sup>c</sup> Shaoping Chen,<sup>e</sup> Jianfeng Fan,<sup>ab</sup> Yuzuru Miyazaki<sup>c</sup>

a. Key Laboratory of Interface Science and Engineering in Advanced Materials, Ministry of Education, Taiyuan University of Technology, Taiyuan 030024, China

b. Shanxi Key Laboratory of Advanced Magnesium-Based Materials, Taiyuan University of Technology, Taiyuan 030024, China

c. Department of Applied Physics, Graduate School of Engineering, Tohoku University, Sendai 980-8579, Japan

d. College of Physics and Optoelectronics, Taiyuan University of Technology, Taiyuan 030024, China

e. College of Materials Science and Engineering, Taiyuan University of Technology, Taiyuan 030024, China

\*Correspondence should be addressed to Qiang Zhang: zhangqiang@tyut.edu.cn

## 1 Experimental section and theoretical calculation

### First-principles calculations

Some basic information regarding the first-principles calculations is given below: **Tabs.1-4** and **Figs. 1-4**.

**Tabs. 1 Parameters of Mg<sub>3</sub>Sb<sub>2</sub> and graphene crystal structure**

| Items                           | Structure parameter                                                                          |
|---------------------------------|----------------------------------------------------------------------------------------------|
|                                 | Space group P-3m1 (No. 164)                                                                  |
| Mg <sub>3</sub> Sb <sub>2</sub> | Lattice constant (Å) a=b=4.55 c=7.24<br>$\alpha=\beta=90.000^\circ$ , $\gamma=120.000^\circ$ |
| Mg (I)                          | (0, 0, 0)                                                                                    |
| Mg (II)                         | (0.3333, 0.6667, 0.3669)                                                                     |
| Sb                              | (0.3333, 0.6667, 0.7738)                                                                     |
|                                 | Space group P6mm                                                                             |
| Graphene                        | Lattice constant (Å) a=b=7.38<br>$\gamma=120.000^\circ$                                      |
| C (I)                           | (0.3333, 0.6667, 0)                                                                          |
| C (II)                          | (0.6667, 0.3333, 0)                                                                          |

**Tabs. 2 Parameters of geometrical optimization**

| Items                               | Parameters                         |
|-------------------------------------|------------------------------------|
| Functional                          | GGA-PBE                            |
| Plane-wave cutoff energy            | 400 eV                             |
| Self-consistent field               | Fine<br>$1 \times 10^{-5}$ eV/atom |
| Monkhorst-Pack <i>k</i> -point mesh | $1 \times 1 \times 1$              |
| Pseudopotential                     | norm-conserving                    |

**Tab. 3 Parameters of calculation for energy band structure**

| Items                | Parameters                |
|----------------------|---------------------------|
| Functional           | GGA-PBE                   |
| Interval             | 0.015/Å                   |
| High symmetry points | $\Gamma$ , K, H, A        |
| Path                 | $\Gamma$ -K-H-A- $\Gamma$ |

**Tab. 4 Parameters of calculation for density of states**

| Item            | Parameters |
|-----------------|------------|
| Functional      | GGA-PBE    |
| $k$ -point mesh | 8x8x8      |

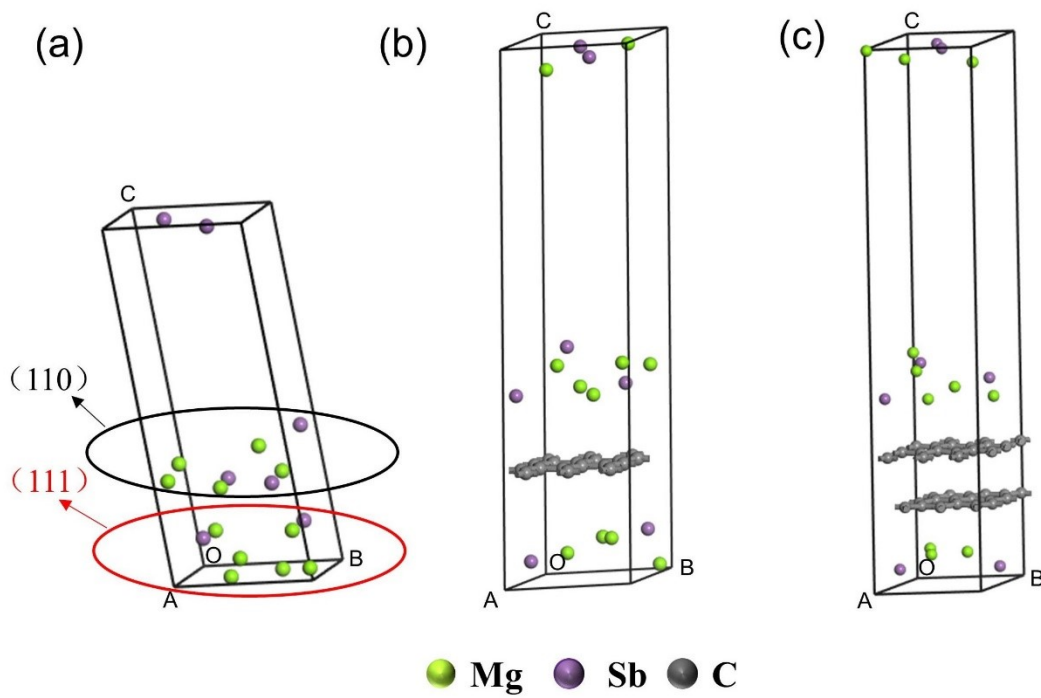

**Figs. 1 Unit cell of three interface structures: (a)  $\text{Mg}_3\text{Sb}_2(110)|\text{Mg}_3\text{Sb}_2(111)$ , (b)  $\text{Mg}_3\text{Sb}_2(110)|\text{G}(1\text{layer})|\text{Mg}_3\text{Sb}_2(111)$ , (c)  $\text{Mg}_3\text{Sb}_2(110)|\text{G}(2\text{layers})|\text{Mg}_3\text{Sb}_2(111)$ .**

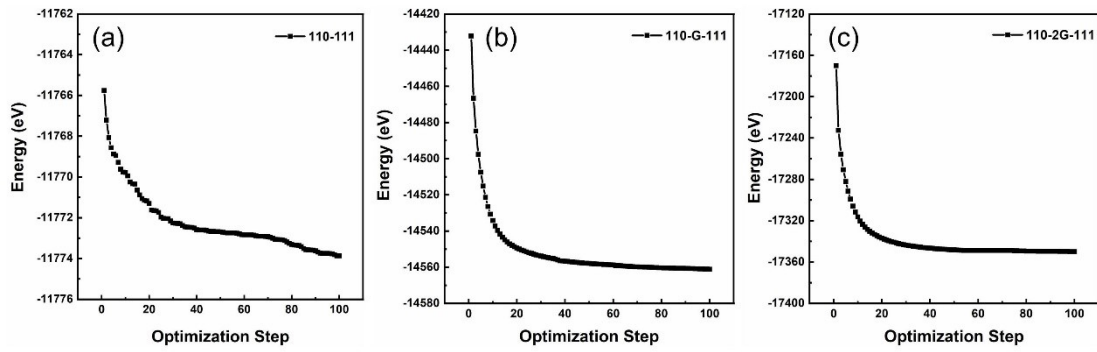

**Figs. 2** Geometry optimization processes for the three interface structures: (a)  $\text{Mg}_3\text{Sb}_2(110)|\text{Mg}_3\text{Sb}_2(111)$ , (b)  $\text{Mg}_3\text{Sb}_2(110)|\text{G}(1\text{layer})|\text{Mg}_3\text{Sb}_2(111)$ , (c)  $\text{Mg}_3\text{Sb}_2(110)|\text{G}(2\text{layers})|\text{Mg}_3\text{Sb}_2(111)$ .

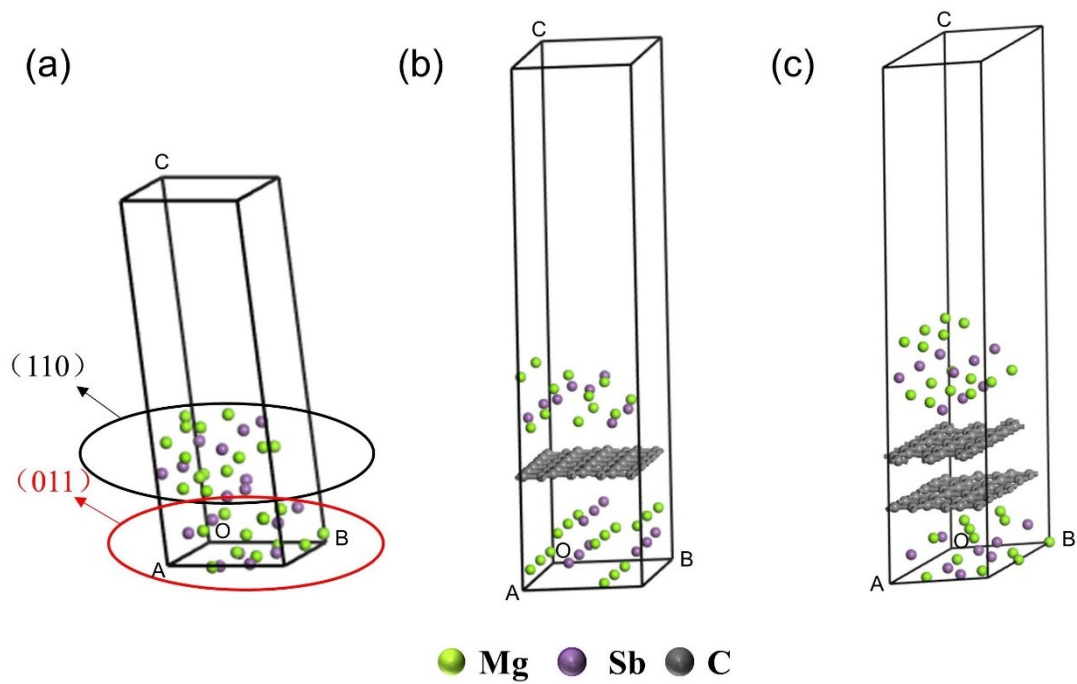

**Figs. 3** Unit cell of three interface structures: (a)  $\text{Mg}_3\text{Sb}_2(110)|\text{Mg}_3\text{Sb}_2(011)$ , (b)  $\text{Mg}_3\text{Sb}_2(110)|\text{G}(1\text{layer})|\text{Mg}_3\text{Sb}_2(011)$ , (c)  $\text{Mg}_3\text{Sb}_2(110)|\text{G}(2\text{layers})|\text{Mg}_3\text{Sb}_2(011)$ .

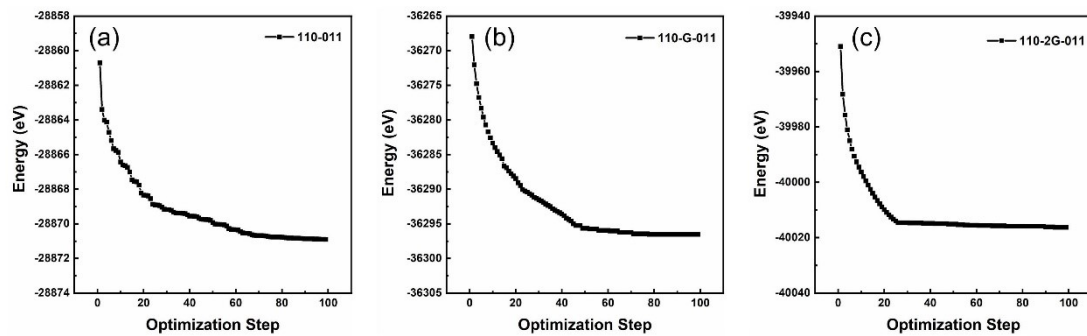

**Figs. 4 Geometry optimization processes for the three interface structures: (a)  $\text{Mg}_3\text{Sb}_2(110)|\text{Mg}_3\text{Sb}_2(011)$ , (b)  $\text{Mg}_3\text{Sb}_2(110)|\text{G}(1\text{layer})|\text{Mg}_3\text{Sb}_2(011)$ , (c)  $\text{Mg}_3\text{Sb}_2(110)|\text{G}(2\text{layers})|\text{Mg}_3\text{Sb}_2(011)$ .**

## 2 Results and Discussion

### 2.1 Phase composition and microstructure characterization

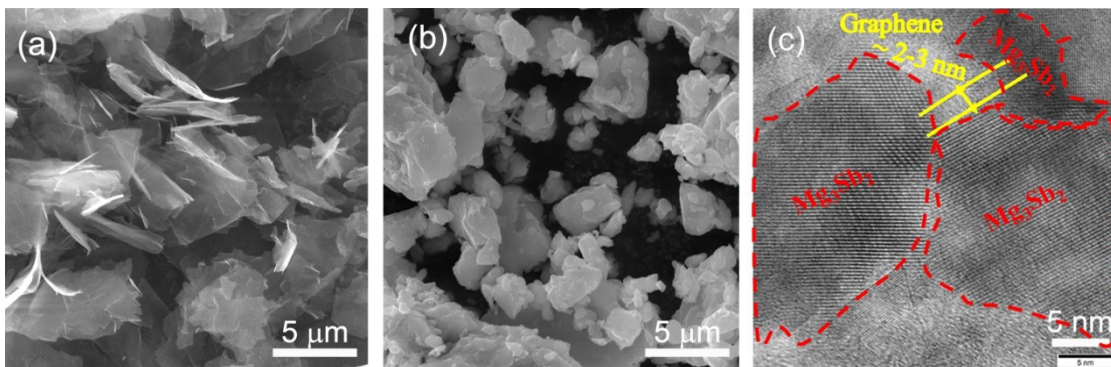

**Figs. 5 (a) 2-dimensional graphene raw materials; (b) morphology of BM-ed powders of  $\text{Mg}_{3.24}\text{Sb}_{1.5}\text{Bi}_{0.49}\text{Te}_{0.01}/1.0 \text{ vol}\% \text{ G}$ ; (c) TEM photos of grain boundary graphene for the  $\text{Mg}_{3.24}\text{Sb}_{1.5}\text{Bi}_{0.49}\text{Te}_{0.01}/1.0 \text{ vol}\% \text{ G}$  sample.**

### 2.2 Electrical transport properties of $\text{Mg}_{3.24}\text{Sb}_{1.5}\text{Bi}_{0.49}\text{Te}_{0.01}/x \text{ vol}\% \text{ G}$ ( $x=0-1.25$ ) samples

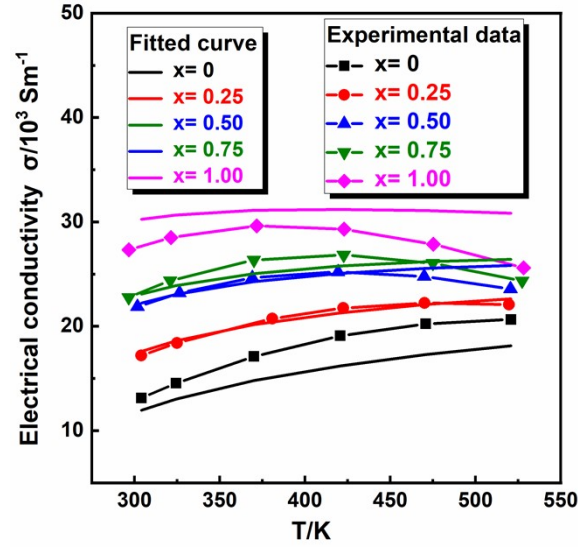

**Figs. 6** The corresponding fitted curves and experimental data based on the trapping state model.

**Tab. 5** The parameters used for fitted curves based on the trapping state model.

| Sample   | Temperature range /K | Elementary charge $e/C$ | Grain size $d/m$     | Carrier density $n/m^3$ | Effective mass $m^*$ | Boltzmann constant $k_B/JK^{-1}$ | Barrier height $E_b$ /meV |
|----------|----------------------|-------------------------|----------------------|-------------------------|----------------------|----------------------------------|---------------------------|
| $x=0$    | 300-525              | $1.60 \times 10^{-19}$  | $2.0 \times 10^{-6}$ | $2.0 \times 10^{25}$    | $1.2 m_e$            | $1.38 \times 10^{-23}$           | 42                        |
| $x=0.25$ | 300-525              | $1.60 \times 10^{-19}$  | $2.0 \times 10^{-6}$ | $2.0 \times 10^{25}$    | $1.2 m_e$            | $1.38 \times 10^{-23}$           | 32                        |
| $x=0.5$  | 300-525              | $1.60 \times 10^{-19}$  | $2.0 \times 10^{-6}$ | $2.0 \times 10^{25}$    | $1.2 m_e$            | $1.38 \times 10^{-23}$           | 25                        |
| $x=0.75$ | 300-525              | $1.60 \times 10^{-19}$  | $2.0 \times 10^{-6}$ | $2.0 \times 10^{25}$    | $1.2 m_e$            | $1.38 \times 10^{-23}$           | 26                        |
| $x=1.0$  | 300-525              | $1.60 \times 10^{-19}$  | $2.0 \times 10^{-6}$ | $2.0 \times 10^{25}$    | $1.2 m_e$            | $1.38 \times 10^{-23}$           | 18                        |

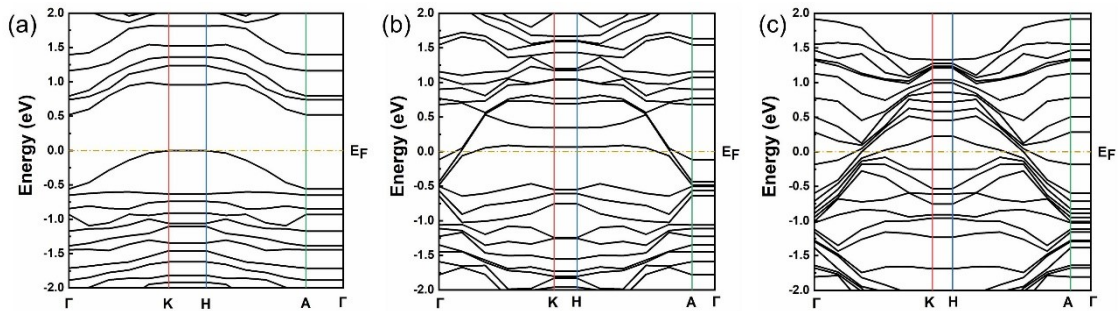

**Figs. 7** Energy band structures of the three interface structures: (a)  $Mg_3Sb_2(110)|Mg_3Sb_2(111)$ , (b)  $Mg_3Sb_2(110)|G(1layer)|Mg_3Sb_2(111)$ , (c)  $Mg_3Sb_2(110)|G(2layers)|Mg_3Sb_2(111)$ .

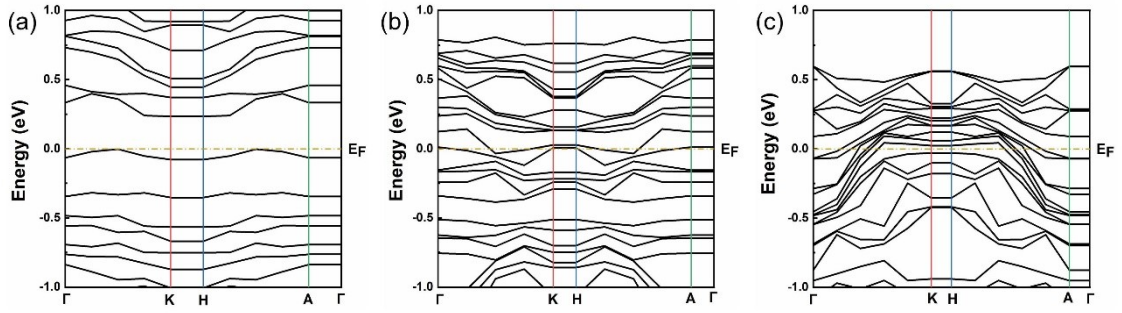

**Figs. 8** Energy band structures of the three interface structures: (a)  $\text{Mg}_3\text{Sb}_2(110)|\text{Mg}_3\text{Sb}_2(011)$ , (b)  $\text{Mg}_3\text{Sb}_2(110)|\text{G}(1\text{layer})|\text{Mg}_3\text{Sb}_2(011)$ , (c)  $\text{Mg}_3\text{Sb}_2(110)|\text{G}(2\text{layers})|\text{Mg}_3\text{Sb}_2(011)$ .

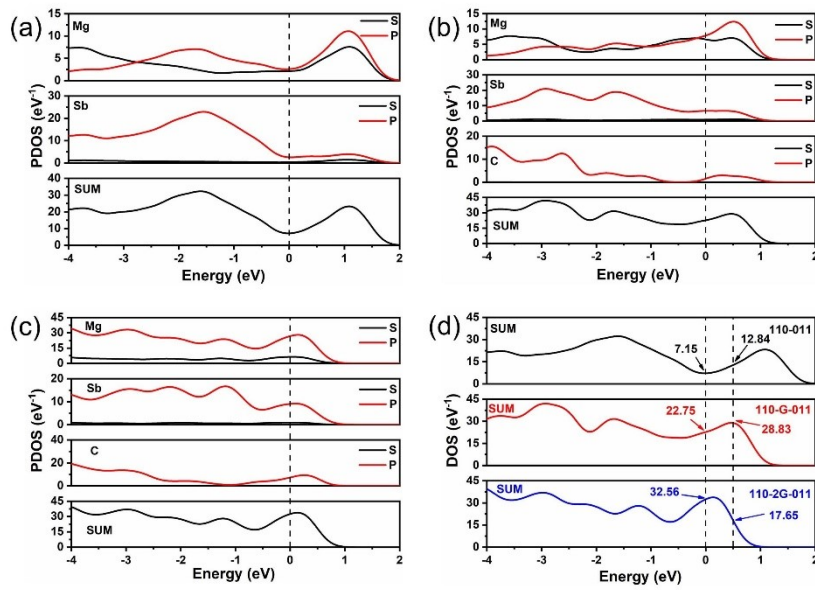

**Figs. 9** Electronic DOS of three interface structures: (a)  $\text{Mg}_3\text{Sb}_2(110)|\text{Mg}_3\text{Sb}_2(111)$ , (b)  $\text{Mg}_3\text{Sb}_2(110)|\text{G}(1\text{layer})|\text{Mg}_3\text{Sb}_2(111)$ , (c)  $\text{Mg}_3\text{Sb}_2(110)|\text{G}(2\text{layers})|\text{Mg}_3\text{Sb}_2(111)$  and (d) the contrast of the total DOS of the three interface structures.

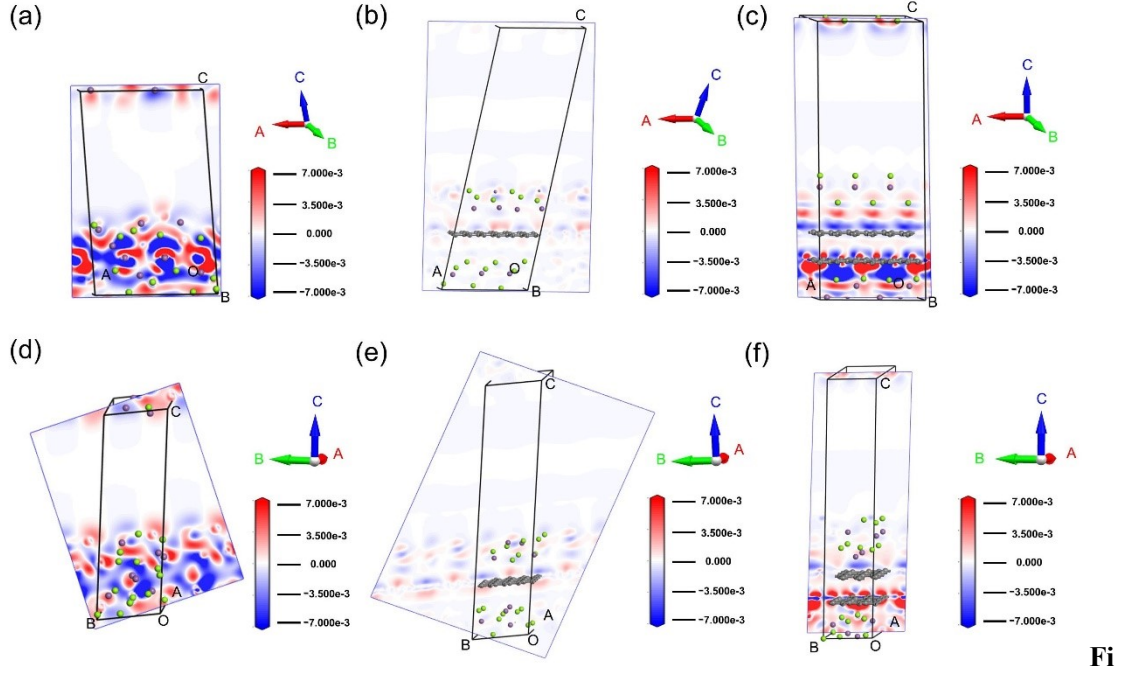

**gs. 10 Charge density difference maps of three interface structures: (a), (d)  $\text{Mg}_3\text{Sb}_2(110)|\text{Mg}_3\text{Sb}_2(011)$ ; (b), (e)  $\text{Mg}_3\text{Sb}_2(110)|\text{G}(1\text{layer})|\text{Mg}_3\text{Sb}_2(011)$ ; (c), (f)  $\text{Mg}_3\text{Sb}_2(110)|\text{G}(2\text{layers})|\text{Mg}_3\text{Sb}_2(011)$  with (a),(b), (c)//(A,C) plane and (d), (e), (f)//(B,C) plane.**

### 2.3 Thermal transport properties of $\text{Mg}_{3.24}\text{Sb}_{1.5}\text{Bi}_{0.49}\text{Te}_{0.01}/x$ vol% G ( $x=0-1.25$ ) samples

To illustrate the effects of G on phonon scattering processes, we employed the Debye-Callaway model to quantitatively differentiate the respective contributions from different phonon scattering mechanisms, and the related equations are given below<sup>1-3</sup>:

$$\kappa_L = \frac{4\pi k_B}{v_s} \left( \frac{k_B T}{h} \right)^3 \int_0^{\theta_D/T} \tau_{tot} \frac{y^4 e^y}{(e^y - 1)^2} dy \quad (1)$$

$$\tau_{tot}^{-1} = \tau_B^{-1} + \tau_{PD}^{-1} + \tau_U^{-1} + \tau_{NP}^{-1} \quad (2)$$

$$\tau_B^{-1} = \frac{v_s}{d_{avg}} \quad (3)$$

$$\tau_{PD}^{-1} = A\omega^4 = \frac{\bar{V}\Gamma}{4\pi v_s^3} \omega^4 \quad (4)$$



$$\tau_U^{-1} = B\omega^2 T \exp\left(-\frac{\theta_D}{3T}\right) = \frac{h\gamma^2}{2\pi M_{avg} v_s^2 \theta_D} \omega^2 T \exp\left(-\frac{\theta_D}{3T}\right)$$

(5)

$$\tau_{NP}^{-1} = v_s V_{NP} \left[ (2\pi R^2)^{-1} + \left( \frac{4}{9} \pi R^2 (\Delta\rho/\rho_0)^2 (\omega R/v_s)^4 \right)^{-1} \right]^{-1} \quad (6)$$

$$\theta_D = \frac{h}{k_B} \left( \frac{3N}{4\pi V} \right)^{1/3} v_s \quad (7)$$

$$\Gamma = \Gamma_m + \Gamma_s \quad (8)$$

$$\Gamma_m = \frac{\sum_{i=1}^n c_i \left( \frac{\bar{M}}{\bar{M}} \right)^2 f_1 f_2 \left( \frac{M_1 - M_2}{\bar{M}} \right)^2}{\sum_{i=1}^n c_i}$$

(9)

$$\Gamma_s = \frac{\sum_{i=1}^n c_i \left( \frac{\bar{M}}{\bar{M}} \right)^2 f_1 f_2 \varepsilon \left( \frac{r_1 - r_2}{\bar{r}} \right)^2}{\sum_{i=1}^n c_i}$$

(10)

$$\bar{M} = f_1 M_1 + f_2 M_2 \quad (11)$$

$$\bar{\bar{M}} = \left( \frac{\sum_{i=1}^n c_i \bar{M}}{\sum_{i=1}^n c_i} \right) \quad (12)$$

$$\bar{r} = f_1 r_1 + f_2 r_2 \quad (13)$$

$$\varepsilon = \frac{2}{9} \left( \frac{6.4 \times \gamma(1+\nu)}{1-\nu} \right)^2$$

(14)

Where  $y = \hbar\omega/k_B T$ ,  $\tau$ ,  $d_{avg}$ ,  $\theta_D$ ,  $\bar{V}$ ,  $\gamma$ ,  $N$ ,  $\hbar$ ,  $\omega$ ,  $\nu$ ,  $\varepsilon$  are the reduced phonon energy, the phonon relaxation

time, the average grain size, the Debye temperature, the average atomic volume, the Grüneisen parameter, and the number of atoms in a primitive unit cell, the reduced Planck constant, the phonon frequency, Poisson's ratio, strain field-related adjustable parameter, respectively.

**Tab. 6 Parameters related to the Debye-Callaway model calculation**

| Parameters                                | Symbol        | Value                                                         |
|-------------------------------------------|---------------|---------------------------------------------------------------|
| Average sound velocity                    | $v_s$         | 2155 ms <sup>-1</sup> [4]                                     |
| Debye temperature                         | $\theta_D$    | 215 K [5]                                                     |
| Debye frequency                           | $\omega_D$    | $2.81 \times 10^{13}$ s <sup>-1</sup> [Cal. from $\theta_D$ ] |
| Grüneisen parameter                       | $\gamma$      | 1.87 [6]                                                      |
| Poisson's ratio                           | $\nu$         | 0.34 [5]                                                      |
| Average atomic mass                       | $\bar{M}$     | $1.20 \times 10^{-25}$ kg [Cal.]                              |
| Average atomic volume                     | $\bar{V}$     | $2.62 \times 10^{-29}$ m <sup>3</sup> [Cal.]                  |
|                                           |               | 2.20 $\mu$ m [Cal.]                                           |
| Average grain size                        | $d_{avg}$     | 2.22 $\mu$ m [Exp.] ( <b>Figs. 11(a), (b)</b> )               |
|                                           |               | 1.92 $\mu$ m [Exp.] ( <b>Figs. 11(c), (d)</b> )               |
| Density of graphene                       | $\rho_G$      | $2.20 \times 10^3$ kgm <sup>-3</sup> [7]                      |
| Density of matrix                         | $\rho$        | $4.40 \times 10^3$ kgm <sup>-3</sup> [Exp.]                   |
| Mass fluctuation parameter                | $\Gamma_m$    | 0.110 [Cal.]                                                  |
| Strain fluctuation parameter              | $\Gamma_s$    | 0.426 [Cal.]                                                  |
| strain field-related adjustable parameter | $\varepsilon$ | 134.21 [Cal.]                                                 |
| Point-defect phonon scattering factor     | $A$           | $1.15 \times 10^{-40}$ s <sup>3</sup> [Cal.]                  |
| U-process phonon scattering factor        | $B$           | $3.08 \times 10^{-18}$ sK <sup>-1</sup> [Cal.]                |
|                                           |               | 68 nm (x=0.25)                                                |
| Equivalent size                           | $R$           | 69 nm (x=0.50) [Cal.]                                         |
|                                           |               | 75 nm (x=0.75)                                                |
|                                           |               | 89 nm (x=0.10)                                                |
|                                           |               | $6.05 \times 10^{18}$ m <sup>-3</sup> (x=0.25)                |
| Number density of graphene                | $V_{NP}$      | $1.21 \times 10^{19}$ m <sup>-3</sup> (x=0.50) [Cal.]         |
|                                           |               | $1.81 \times 10^{19}$ m <sup>-3</sup> (x=0.75)                |
|                                           |               | $2.42 \times 10^{19}$ m <sup>-3</sup> (x=0.10)                |

**Footnote: (1) [No.]-From reference; (2) [Cal.]-From calculation; (3) [Exp.]-From experiment.**

**Tab. 7  $\tau_{tot}^{-1}$  in  $\kappa_s$  as a function of the reduced phonon energy  $y$**

| Sample | $\tau_B^{-1}$ (s <sup>-1</sup> ) | $\tau_{PD}^{-1}$ (s <sup>-1</sup> )  | $\tau_U^{-1}$ (s <sup>-1</sup> )     | $\tau_{NP}^{-1}$ (s <sup>-1</sup> )                                 |
|--------|----------------------------------|--------------------------------------|--------------------------------------|---------------------------------------------------------------------|
| x=0    | $9.80 \times 10^8$               | $2.74 \times 10^{14}$ y <sup>4</sup> | $1.12 \times 10^{12}$ y <sup>2</sup> | --                                                                  |
| x=0.25 | $9.80 \times 10^8$               | $2.74 \times 10^{14}$ y <sup>4</sup> | $1.12 \times 10^{12}$ y <sup>2</sup> | $1.30 \times 10^{22} / (3.44 \times 10^{13} + 262)$ y <sup>-4</sup> |
| x=0.50 | $9.80 \times 10^8$               | $2.74 \times 10^{14}$ y <sup>4</sup> | $1.12 \times 10^{12}$ y <sup>2</sup> | $2.61 \times 10^{22} / (3.34 \times 10^{13} + 240)$ y <sup>-4</sup> |
| x=0.75 | $9.80 \times 10^8$               | $2.74 \times 10^{14}$ y <sup>4</sup> | $1.12 \times 10^{12}$ y <sup>2</sup> | $3.90 \times 10^{22} / (2.83 \times 10^{13} + 146)$ y <sup>-4</sup> |

---


$$x=1.0 \quad 9.80 \times 10^8 \quad 2.74 \times 10^{14} \text{ y}^4 \quad 1.12 \times 10^{12} \text{ y}^2 \quad 5.22 \times 10^{22} / (2.01 \times 10^{13} + 52.3 \text{ y}^{-4})$$


---

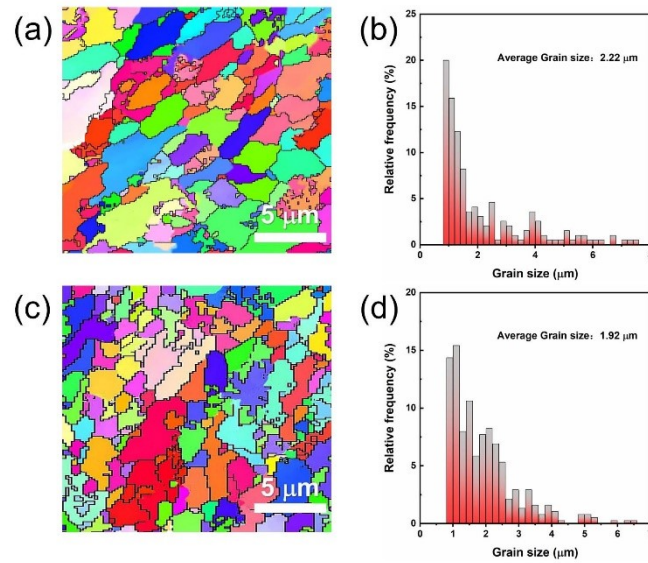

**Figs. 11**  $\text{Mg}_{3.24}\text{Sb}_{1.5}\text{Bi}_{0.49}\text{Te}_{0.01}/0$  vol% G (a) EBSD map, (b) grain size ;  
 $\text{Mg}_{3.24}\text{Sb}_{1.5}\text{Bi}_{0.49}\text{Te}_{0.01}/1.0$  vol% G (c) EBSD map, (d) grain size

#### References:

1. J. Callaway and H. C. von Baeyer, *Physical Review*, 1960, **120**, 1149.
2. J. He, S. N. Girard, M. G. Kanatzidis and V. P. Dravid, *Advanced Functional Materials*, 2010, **20**, 764-772.
3. D. An, S. Chen, Z. Lu, R. Li, W. Chen, W. Fan, W. Wang and Y. Wu, *ACS applied materials & interfaces*, 2019, **11**, 27788-27797.
4. B. Zhu, X. Lu, J. Li, W. Xie, L. Wang, Q. Zhang, J. Fan and Y. Zheng, *ChemNanoMat*, 2023, **9**, e202200400.
5. M. T. Agne, K. Imasato, S. Anand, K. Lee, S. K. Bux, A. Zevalkink, A. J. Rettie, D. Y. Chung, M. G. Kanatzidis and G. J. Snyder, *Materials Today Physics*, 2018, **6**, 83-88.
6. J. Li, S. Zhang, B. Wang, S. Liu, L. Yue, G. Lu and S. Zheng, *Journal of Materials Chemistry A*, 2018, **6**, 20454-20462.
7. D. Chung, *Journal of materials science*, 2002, **37**, 1475-1489.
